# Supplementary material for: Genomic analysis of global Plasmodium vivax populations reveals insights into the evolution of drug resistance
Source: PubMed Central journal article supplement (PMC11685768; doi:10.1038/s41467-024-54964-x), 2024-12-30
Supplement: 41467_2024_54964_MOESM3_ESM.pdf [file 41467_2024_54964_MOESM3_ESM.pdf]

## Description of Additional Supplementary Files

File: Supplementary Data 1

Description: Samples, Provenance, and Accessions.

File: Supplementary Data 2

Description: Current and previous antimalarial use in *P. vivax* endemic countries with >10 samples available for analysis, and their corresponding chloroquine resistance (CQR) status. Countries now certified malaria-free have been excluded.

File: Supplementary Data 3

Description: All studies used to attribute chloroquine resistance status. "New" studies refer to those found in 2019-present date, post Price et al.'s 2014 meta-analysis and WWARN's Vivax Surveyor, using the same research methodology. Table was taken from WWARN's Vivax Surveyor and adapted to add new studies.

File: Supplementary Data 4

Description: Number (N) of Highly Differentiating SNPs with an  $F_{ST}$  value  $\geq 0.8$ ,  $\geq 0.95$ ,  $\geq 0.99$ , and 1. SEA = South East Asia.

File: Supplementary Data 5

Description: Median Genome-wide Identity by Descent (IBD) Fractions in all regions and countries with  $\geq 10$  monoclonal isolates ( $F_{WS} \geq 0.95$ ). SEA= South East Asia.

File: Supplementary Data 6

Description: Inter-Regional Median Genome-Wide Identity by Descent (IBD) Fractions in Monoclonal Isolates ( $F_{WS} \geq 0.95$ ). SEA = South East Asia.

File: Supplementary Data 7

Description: Top 1% of Regions with Highest Proportion of Pairwise Identity by Descent (IBD).

File: Supplementary Data 8

Description: Intra-Population Pairwise IBD at the 200-500 kb Region on Chromosome 10. SEA = South East Asia.

File: Supplementary Data 9

Description: Top 1% integrated Haplotype Homozygosity Scores (iHS, Within-Population Statistic) to Detect Selection in Countries with  $N \geq 10$ . Loci in critical regions are defined here as SNPs in genes with a  $p$  value of  $P < 1 \times 10^{-4}$  (two-sided test).

File: Supplementary Data 10

Description: Top 1%  $R_{sb}$  Scores (Between-Population Statistic) Between Countries with  $N \geq 10$  Each. Loci in critical regions are defined here as SNPs in genes with a  $p$  value of  $P < 1 \times 10^{-5}$  (two-sided test).

File: Supplementary Data 11

Description: Top 1%  $XP-EHH$  Scores (Between-Population Statistic) Between Countries with  $N \geq 10$  Each. Loci in critical regions are defined here as SNPs in genes with a  $p$  value of  $P < 1 \times 10^{-5}$  (two-sided test).

File: Supplementary Data 12

Description: Candidate regions of interest based on Top 1% *iHS*, *Rsb*, XP-EHH, and *IBD* Scores when comparing Indonesian Papua isolates (high-grade chloroquine resistance) with regions that are chloroquine sensitive.

File: Supplementary Data 13

Description: Non-Synonymous Mutations in Putative Drug Resistance-Associated Loci

File: Supplementary Data 14

Description: Haplotypes in *pvdhfr*, *pvdhps*, *pvmrp1*, and *pvmdr1* in monoclonal isolates.

File: Supplementary Data 15

Description: Nucleotide diversity ( $\pi$ ) calculated in 100 bp windows and haplotype diversity ( $h$ ) of *pvmdr1*

File: Supplementary Data 16

Description: Top 1% of  $F_{ST}$  values (Population Differentiation) between Indonesian Papua isolates between 2008-2008 vs. 2016-2017 and Pre-2014 vs. Post-2014.

File: Supplementary Data 17

Description: Top 1% integrated Haplotype Homozygosity Scores (*iHS*, Within-Population Statistic) to Detect Selection in Indonesian Papua isolates categorised by year groupings (2008-09, 2010-11, 2012-13, 2014-2015, 2016-17) and Pre vs. or Post 2014 Groupings. Loci in critical regions are defined here as SNPs in genes with a  $p$  value of  $P < 1 \times 10^{-4}$  (two-sided test).

File: Supplementary Data 18

Description: Top 1% *Rsb* Scores (Between-Population Statistic) to Detect Selection Between Indonesian Papua isolates categorised by year groupings (2008-09, 2010-11, 2012-13, 2014-15, 2016-17). Loci in critical regions are defined here as SNPs in genes with a  $p$  value of  $P < 1 \times 10^{-5}$  (two-sided test).

File: Supplementary Data 19

Description: Top 1% XP-EHH Scores (Between-Population Statistic) to Detect Selection Between Indonesian Papua isolates categorised by year groupings (2008-09, 2010-11, 2012-13, 2014-15, 2016-17). Loci in critical regions are defined here as SNPs in genes with a  $p$  value of  $P < 1 \times 10^{-5}$  (two-sided test).
